# Supplementary material for: Roles of solution concentration and shear rate in the shear-induced crystallization of P3HT
Source: Royal Society of Chemistry journal article supplement (doi:10.1039/d1ra02594e), 2021-01-01
Supplement: d1ra02594e1.pdf [file d1ra02594e1.pdf]

### Supporting Information

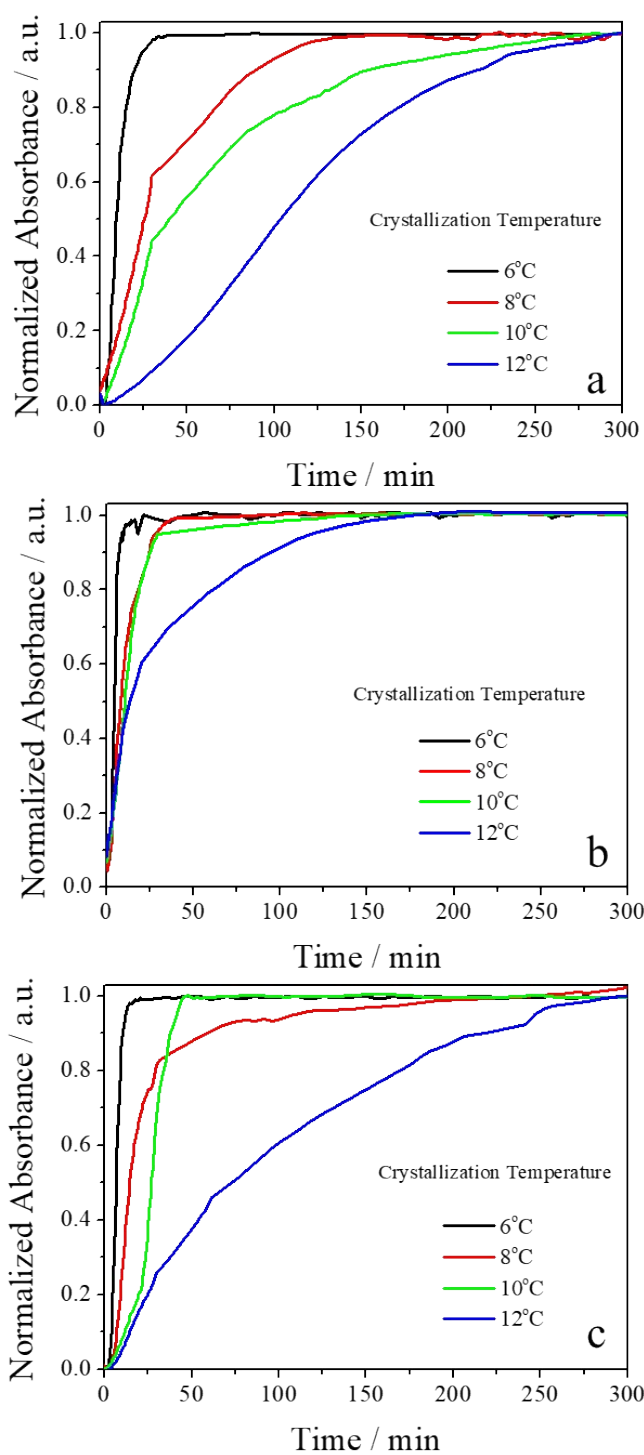

Figure S1. Absorbance at  $\lambda \sim 607$  nm versus crystallization time of P3HT dilute solutions at different crystallization temperatures: (a) PR<sub>0.2, 60</sub> (b) PS<sub>0.2, 60</sub> and (c) PS<sub>0.2,</sub>

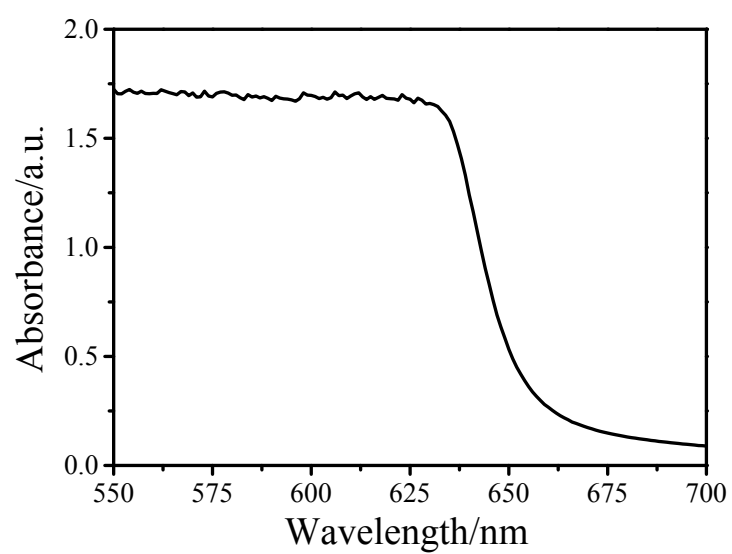

Figure S2. UV-vis absorption spectra of PS<sub>5,0,12</sub>.

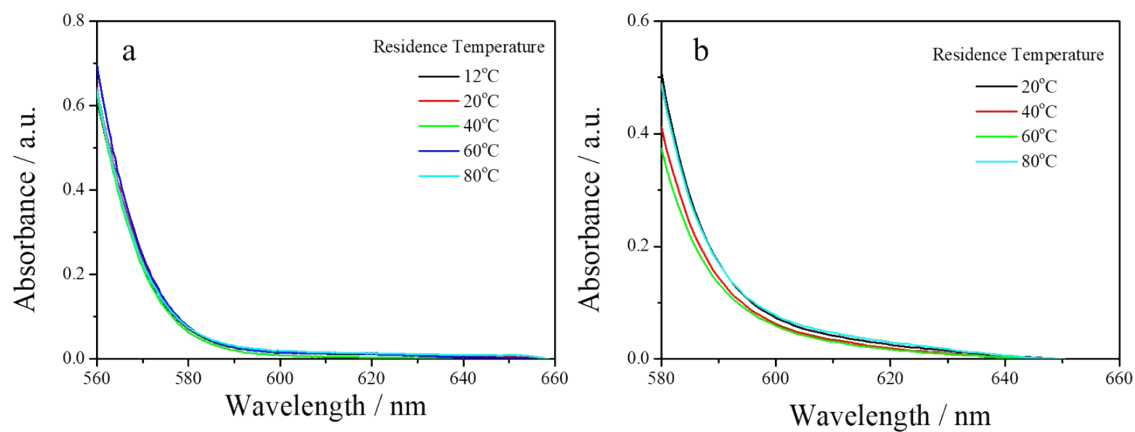

Figure S3. UV-vis absorption spectra of (a) PR<sub>0.7</sub> and (b) PR<sub>5.0</sub> at different residence temperatures.

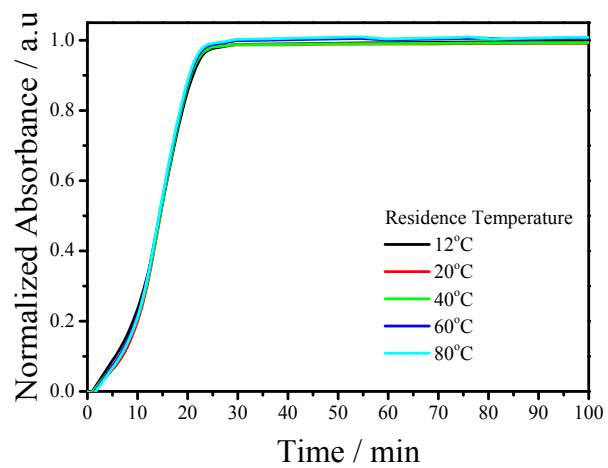

Figure S4. Absorbance at  $\lambda \sim 607$  nm versus crystallization time of PR<sub>0.7</sub> at 12 °C.

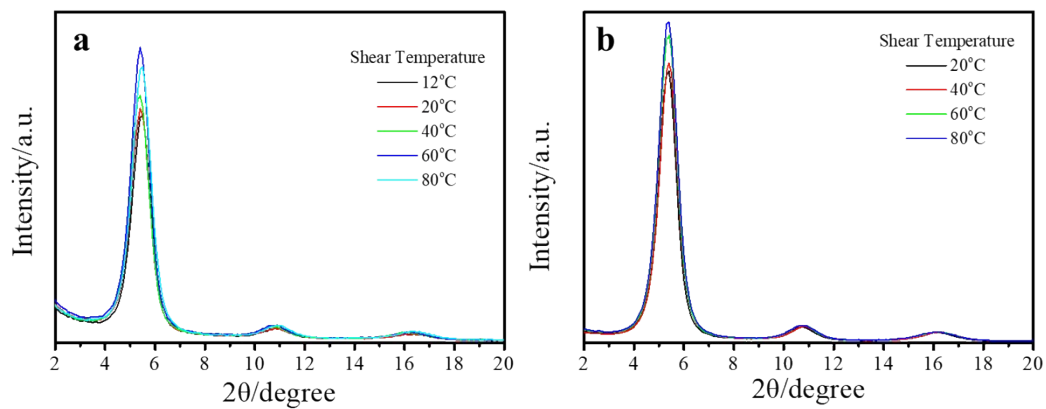

Figure S5. GIXRD of P3HT films spin-coated from sheared solutions (isothermally crystallized at 12 °C) with different shear temperatures: (a) PS<sub>0.7</sub> and (b) PS<sub>5.0</sub>. The shear rate is 1.0 s<sup>-1</sup>.

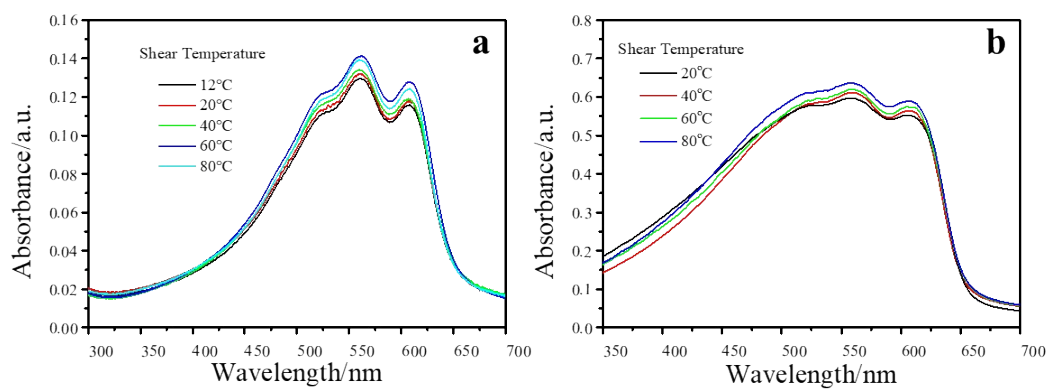

Figure S6. UV-vis absorption spectra of P3HT films spin-coated from sheared solutions (isothermally crystallized at 12 °C) with different concentrations: (a) PS<sub>0.7</sub> and (b) PS<sub>5.0</sub>. The shear rate is 1.0 s<sup>-1</sup>.

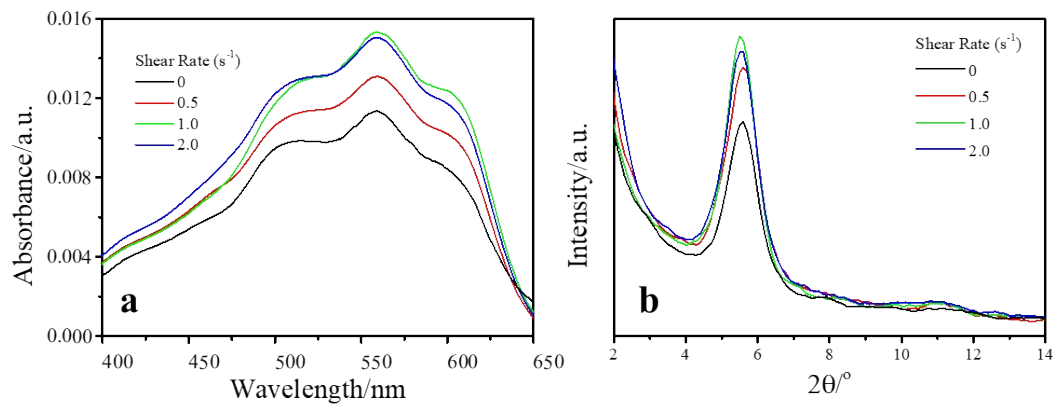

Figure S7. (a) UV-vis absorption spectra and (b) GIXRD curves of P3HT films spin-coated from isothermally crystallized  $PS_{0.2,60}$  sheared at different shear rates.
